# Supplementary material for: The effects of physical activity on sleep: a meta-analytic review
Source: Springer Nature journal article supplement (doi:10.1007/s10865-015-9617-6), 2015-01-17
Supplement: 10865_2015_9617_MOESM1_ESM.pdf [file 10865_2015_9617_MOESM1_ESM.pdf]

| Table 3. Study, Participant, and Exercise Characteristics - Acute Exercise Studies |       |                     |                |              |                             |       |          |                                  |                                              |                          |                      |                |                     |                     |                    |                       |                       |                          |   |
|------------------------------------------------------------------------------------|-------|---------------------|----------------|--------------|-----------------------------|-------|----------|----------------------------------|----------------------------------------------|--------------------------|----------------------|----------------|---------------------|---------------------|--------------------|-----------------------|-----------------------|--------------------------|---|
| Study Characteristics                                                              |       |                     |                |              | Participant Characteristics |       |          |                                  |                                              | Exercise Characteristics |                      |                |                     |                     |                    |                       | Sleep Characteristics |                          |   |
| Author(s)                                                                          | Year  | Subgroup            | n <sup>a</sup> | Study design | Population description      | M age | % Female | Baseline physical activity level | Identified as having sleep complaints? (y/n) | Intensity                | Aerobic or anaerobic | Exercise type  | Time of day         | Duration (mins/day) | Duration (days/wk) | Total duration (mins) | Assessment type       | Objective measure? (y/n) |   |
| Baekeland et al.                                                                   | 1966  | Afternoon exercise  | 10             | Open Trial   | athletes/regular exercisers | .     | 0%       | high                             | n                                            | .                        | aerobic              | mixed          | .                   | variable            | 1                  | variable              | EEG                   | y                        |   |
| Baekeland et al.                                                                   | 1966  | Evening exercise    | (10)           | Open Trial   | athletes/regular exercisers | .     | 0%       | high                             | n                                            | .                        | aerobic              | mixed          | .                   | variable            | 1                  | variable              | EEG                   | y                        |   |
| Baekeland et al.                                                                   | 1970  |                     | 14             | Open Trial   | athletes/regular exercisers | .     | .        | high                             | n                                            | .                        | mixed                | mixed          | .                   | .                   | 1                  | .                     | EEG                   | y                        |   |
| Zir et al.                                                                         | 1971  |                     | 5              | Open Trial   | healthy                     | 20.0  | 0%       | mixed/unknown                    | n                                            | .                        | mixed                | mixed          | mid-day             | 120                 | 1                  | 120                   | PSG                   | y                        |   |
| Adamson et al.                                                                     | 1974  |                     | 12             | Open Trial   | healthy                     | 25.0  | 0%       | mixed/unknown                    | n                                            | .                        | aerobic              | mixed          | morning             | variable            | 1                  | variable              | EEG                   | y                        |   |
| Desjardins et al.                                                                  | 1974  | High intensity      | 6              | Open Trial   | healthy                     | 25.5  | 0%       | mixed/unknown                    | n                                            | .                        | aerobic              | running        | .                   | 120                 | 1                  | 120                   | .                     | .                        |   |
| Desjardins et al.                                                                  | 1974  | Low intensity       | (6)            | Open Trial   | healthy                     | 25.5  | 0%       | mixed/unknown                    | n                                            | .                        | aerobic              | running        | .                   | 120                 | 1                  | 120                   | .                     | .                        |   |
| Griffin & Trinder                                                                  | 1978  |                     | 16             | Open Trial   | healthy                     | 23.4  | 50%      | mixed/unknown                    | n                                            | .                        | aerobic              | running        | mid-day             | variable            | 1                  | variable              | EEG                   | y                        |   |
| Walker et al.                                                                      | 1978  | Nonrunners          | 10             | Open Trial   | healthy                     | 19.8  | 0%       | mixed/unknown                    | n                                            | .                        | aerobic              | running        | mid-day             | 13.6                | 1                  | 13.6                  | EEG                   | y                        |   |
| Walker et al.                                                                      | 1978  | Runners             | 10             | Open Trial   | athletes/regular exercisers | 19.8  | 0%       | high                             | n                                            | .                        | aerobic              | running        | mid-day             | 35.5                | 1                  | 35.5                  | EEG                   | y                        |   |
| Browman et al.                                                                     | 1980  |                     | 7              | Open Trial   | healthy                     | 20.5  | 57%      | mixed/unknown                    | n                                            | .                        | anaerobic            | resistance     | late night          | 80                  | 1                  | 80                    | PSG                   | y                        |   |
| Jennings et al.                                                                    | 1981  |                     | 9              | RCT          | obese                       | 33.3  | 100%     | mixed/unknown                    | n                                            | .                        | vigorous             | aerobic        | running             | .                   | variable           | 1                     | variable              | PSG                      | y |
| Paxton et al.                                                                      | 1982  |                     | 24             | Open Trial   | healthy                     | 21.7  | 42%      | mixed/unknown                    | n                                            | .                        | vigorous             | aerobic        | cycling             | mid-day             | 55                 | 1                     | 55                    | EEG                      | y |
| Trinder et al.                                                                     | 1982  |                     | 12             | Open Trial   | athletes/regular exercisers | 26.9  | 17%      | high                             | n                                            | .                        | mixed                | mixed          | mid-day             | variable            | 1                  | variable              | EEG                   | y                        |   |
| Bunnell et al.                                                                     | 1983a |                     | 9              | Open Trial   | healthy                     | 25.3  | 56%      | mixed/unknown                    | n                                            | .                        | moderate             | aerobic        | walking             | morning             | 151                | 1                     | 151                   | EEG                      | y |
| Bunnell et al.                                                                     | 1983b | Exercisers          | 4              | Open Trial   | athletes/regular exercisers | 25.5  | 50%      | high                             | n                                            | .                        | aerobic              | walking        | mid-day             | 26                  | 1                  | 26                    | EEG                   | y                        |   |
| Bunnell et al.                                                                     | 1983b | Non-Exercisers      | 4              | Open Trial   | healthy                     | 25.5  | 50%      | mixed/unknown                    | n                                            | .                        | aerobic              | walking        | mid-day             | 30                  | 1                  | 30                    | EEG                   | y                        |   |
| Horne et al.                                                                       | 1983  | High intensity      | 8              | Open Trial   | athletes/regular exercisers | 25.4  | 25%      | high                             | n                                            | .                        | vigorous             | aerobic        | running             | mid-day             | 80                 | 1                     | 80                    | EEG                      | y |
| Horne et al.                                                                       | 1983  | Low intensity       | (8)            | Open Trial   | athletes/regular exercisers | 25.4  | 25%      | high                             | n                                            | .                        | light                | aerobic        | running             | mid-day             | 80                 | 1                     | 80                    | EEG                      | y |
| Paxton et al.                                                                      | 1983  |                     | 8              | Open Trial   | athletes/regular exercisers | 20.3  | 0%       | high                             | n                                            | .                        | mixed                | mixed          | mid-day             | .                   | 1                  | .                     | EEG                   | y                        |   |
| Matsumoto et al.                                                                   | 1984  |                     | 6              | Open Trial   | healthy                     | 22.0  | 0%       | mixed/unknown                    | n                                            | .                        | moderate             | aerobic        | cycling             | .                   | 140                | 1                     | 140                   | PSG                      | y |
| Horne & Moore                                                                      | 1985  |                     | 6              | Open Trial   | athletes/regular exercisers | 21.5  | 100%     | high                             | n                                            | .                        | vigorous             | aerobic        | running             | mid-day             | 80                 | 1                     | 80                    | EEG                      | y |
| Kupfer et al.                                                                      | 1985  | Double exercise     | 10             | Open Trial   | athletes/regular exercisers | 24.8  | 0%       | high                             | n                                            | .                        | aerobic              | running        | .                   | variable            | 1                  | variable              | EEG                   | y                        |   |
| Kupfer et al.                                                                      | 1985  | Regular exercise    | (10)           | Open Trial   | athletes/regular exercisers | 24.8  | 0%       | high                             | n                                            | .                        | aerobic              | running        | .                   | variable            | 1                  | variable              | EEG                   | y                        |   |
| Montgomery et al                                                                   | 1985  |                     | 8              | Open Trial   | athletes/regular exercisers | 40.8  | .        | high                             | n                                            | .                        | aerobic              | running        | mid-day             | 90                  | 1                  | 90                    | .                     | .                        |   |
| Shapiro et al.                                                                     | 1985  | Neutral environment | 4              | Open Trial   | healthy                     | 19.8  | 0%       | mixed/unknown                    | n                                            | .                        | aerobic              | running        | morning             | 12                  | 1                  | 12                    | PSG                   | y                        |   |
| Driver et al.                                                                      | 1988  |                     | 9              | Open Trial   | healthy                     | 24.0  | 100%     | low                              | n                                            | .                        | vigorous             | aerobic        | cycling             | mid-day             | 60                 | 1                     | 60                    | EEG                      | y |
| Montgomery et al                                                                   | 1988  | Experiment 1        | 7              | Open Trial   | athletes/regular exercisers | 23    | 0%       | high                             | n                                            | .                        | aerobic              | .              | .                   | .                   | 1                  | .                     | EEG                   | y                        |   |
| Montgomery et al                                                                   | 1988  | Experiment 2        | 22             | Open Trial   | athletes/regular exercisers | 32.5  | 0%       | high                             | n                                            | .                        | aerobic              | .              | .                   | .                   | 1                  | .                     | EEG                   | y                        |   |
| Montgomery et al                                                                   | 1988  | Experiment 3        | 10             | Open Trial   | athletes/regular exercisers | 22.5  | .        | high                             | n                                            | .                        | anaerobic            | power training | .                   | .                   | 1                  | .                     | EEG                   | y                        |   |
| Vein et al.                                                                        | 1991  |                     | 30             | Open Trial   | healthy                     | 27.0  | 0%       | mixed/unknown                    | n                                            | .                        | aerobic              | cycling        | late night          | 120                 | 1                  | 120                   | PSG                   | y                        |   |
| Bevier et al.                                                                      | 1992  |                     | 14             | Open Trial   | healthy                     | 63.9  | 57%      | mixed/unknown                    | n                                            | .                        | moderate             | aerobic        | walking             | mid-day             | 60                 | 1                     | 60                    | EEG                      | y |
| Driver et al.                                                                      | 1994  |                     | 8              | Open Trial   | athletes/regular exercisers | 30.0  | 0%       | high                             | n                                            | .                        | aerobic              | running        | morning             | 65                  | 1                  | 65                    | EEG                   | y                        |   |
| Montmayer et al.                                                                   | 1994  |                     | 4              | Open Trial   | athletes/regular exercisers | 23.0  | 0%       | high                             | n                                            | .                        | aerobic              | cycling        | mid-day             | 66                  | 1                  | 66                    | PSG                   | y                        |   |
| O'Connor et al.                                                                    | 1998  | Low intensity       | 8              | Open Trial   | healthy                     | 20.8  | 0%       | mixed/unknown                    | n                                            | .                        | aerobic              | cycling        | late night          | 60                  | 1                  | 60                    | SAD                   | n                        |   |
| O'Connor et al.                                                                    | 1998  | Moderate intensity  | (8)            | Open Trial   | healthy                     | 20.8  | 0%       | mixed/unknown                    | n                                            | .                        | moderate             | aerobic        | cycling             | late night          | 60                 | 1                     | 60                    | SAD                      | n |
| Oda et al.                                                                         | 2001  |                     | 8              | Open Trial   | healthy                     | 22.8  | 0%       | mixed/unknown                    | n                                            | .                        | light                | aerobic        | underwater aerobics | mid-day             | 50                 | 1                     | 50                    | PSG                      | y |
| Hague et al.                                                                       | 2003  |                     | 15             | Open Trial   | athletes/regular exercisers | 21.7  | 50%      | high                             | n                                            | .                        | aerobic              | mixed          | .                   | 129                 | 1                  | 129                   | ACT                   | y                        |   |
| Alessi et al.                                                                      | 2005  |                     | 118            | RCT          | nursing home residents      | 86.9  | 77%      | mixed/unknown                    | n                                            | .                        | mixed                | mixed          | .                   | 45                  | 5                  | 225                   | ACT                   | y                        |   |
| Esteves et al.                                                                     | 2009  |                     | 22             | Open Trial   | PLM patients                | 46.3  | 64%      | low                              | y                                            | .                        | vigorous             | aerobic        | cycling             | morning             | variable           | 1                     | variable              | PSG                      | y |
| Passos et al.                                                                      | 2010  | High aerobic        | 24             | RCT          | insomnia patients           | 43.7  | 75%      | mixed/unknown                    | y                                            | .                        | vigorous             | aerobic        | running             | mid-day             | 30                 | 1                     | 30                    | PSG                      | y |
| Passos et al.                                                                      | 2010  | Moderate aerobic    | 12(12)         | RCT          | insomnia patients           | 46.5  | 79%      | mixed/unknown                    | y                                            | .                        | moderate             | aerobic        | running             | mid-day             | 50                 | 1                     | 50                    | PSG                      | y |
| Passos et al.                                                                      | 2010  | Moderate resistance | 12(12)         | RCT          | insomnia patients           | 43.8  | 79%      | mixed/unknown                    | y                                            | .                        | moderate             | anaerobic      | mixed               | mid-day             | 50                 | 1                     | 50                    | PSG                      | y |
| Bulckaert et al.                                                                   | 2011  |                     | 9              | Open Trial   | healthy                     | 23.0  | 56%      | mixed/unknown                    | n                                            | .                        | moderate             | aerobic        | cycling             | late night          | 60                 | 1                     | 60                    | PSG                      | y |
| Morita et al.                                                                      | 2011  |                     | 42             | Open Trial   | sleep complaints            | 44.4  | 39%      | mixed/unknown                    | y                                            | .                        | aerobic              | walking        | morning             | 120                 | 1                  | 120                   | SR/ACT                | mixed                    |   |
| Myllymäki et al.                                                                   | 2011  |                     | 11             | Open Trial   | healthy                     | 26.0  | 36%      | mixed/unknown                    | n                                            | .                        | vigorous             | aerobic        | cycling             | late night          | 35                 | 1                     | 35                    | PSG/ACT                  | y |
| Flausino et al.                                                                    | 2012  | 30 mins, VT1        | 17             | Open Trial   | healthy                     | 27.2  | 0%       | mixed/unknown                    | n                                            | .                        | moderate             | aerobic        | running             | late night          | 30                 | 1                     | 30                    | PSG                      | y |
| Flausino et al.                                                                    | 2012  | 60 mins, VT1        | (17)           | Open Trial   | healthy                     | 27.2  | 0%       | mixed/unknown                    | n                                            | .                        | aerobic              | running        | late night          | 60                  | 1                  | 60                    | PSG                   | y                        |   |
| Flausino et al.                                                                    | 2012  | 30 mins, VT1.5      | (17)           | Open Trial   | healthy                     | 27.2  | 0%       | mixed/unknown                    | n                                            | .                        | vigorous             | aerobic        | running             | late night          | 30                 | 1                     | 30                    | PSG                      | y |
| Flausino et al.                                                                    | 2012  | 60 mins, VT1.5      | (17)           | Open Trial   | healthy                     | 27.2  | 0%       | mixed/unknown                    | n                                            | .                        | aerobic              | running        | late night          | 60                  | 1                  | 60                    | PSG                   | y                        |   |
| Myllymäki et al.                                                                   | 2012  | 30 mins, easy       | 14             | Open Trial   | healthy                     | 35.9  | 0%       | mixed/unknown                    | n                                            | .                        | light                | aerobic        | running             | mid-day             | 30                 | 1                     | 30                    | ACT                      | y |
| Myllymäki et al.                                                                   | 2012  | 30 mins, moderate   | (14)           | Open Trial   | healthy                     | 35.9  | 0%       | mixed/unknown                    | n                                            | .                        | moderate             | aerobic        | running             | mid-day             | 30                 | 1                     | 30                    | ACT                      | y |
| Myllymäki et al.                                                                   | 2012  | 30 mins, vigorous   | (14)           | Open Trial   | healthy                     | 35.9  | 0%       | mixed/unknown                    | n                                            | .                        | vigorous             | aerobic        | running             | mid-day             | 30                 | 1                     | 30                    | ACT                      | y |
| Myllymäki et al.                                                                   | 2012  | 60 mins, moderate   | (14)           | Open Trial   | healthy                     | 35.9  | 0%       | mixed/unknown                    | n                                            | .                        | moderate             | aerobic        | running             | mid-day             | 60                 | 1                     | 60                    | ACT                      | y |
| Myllymäki et al.                                                                   | 2012  | 90 mins, moderate   | (14)           | Open Trial   | healthy                     | 35.9  | 0%       | mixed/unknown                    | n                                            | .                        | moderate             | aerobic        | running             | mid-day             | 90                 | 1                     | 90                    | ACT                      | y |
| Viana et al.                                                                       | 2012  |                     | 40             | RCT          | healthy                     | 68.0  | 0%       | low                              | n                                            | .                        | moderate             | anaerobic      | resistance          | morning             | 55                 | 1                     | 55                    | PSG                      | y |
| Wong et al.                                                                        | 2013  | 45% VO2max          | 12             | Open Trial   | healthy                     | 25.2  | 75%      | low                              | n                                            | .                        | light                | aerobic        | running             | mid-day             | 46                 | 1                     | 46                    | PSG                      | y |
| Wong et al.                                                                        | 2013  | 55% VO2max          | (12)           | Open Trial   | healthy                     | 25.2  | 75%      | low                              | n                                            | .                        | moderate             | aerobic        | running             | mid-day             | 46                 | 1                     | 46                    | PSG                      | y |
| Wong et al.                                                                        | 2013  | 65% VO2max          | (12)           | Open Trial   | healthy                     | 25.2  | 75%      | low                              | n                                            | .                        | vigorous             | aerobic        | running             | mid-day             | 46                 | 1                     | 46                    | PSG                      | y |
| Wong et al.                                                                        | 2013  | 75% VO2max          | (12)           | Open Trial   | healthy                     | 25.2  | 75%      | low                              | n                                            | .                        | vigorous             | aerobic        | running             | mid-day             | 46                 | 1                     | 46                    | PSG                      | y |

<sup>a</sup>Participants utilized multiple times are noted in parentheses

Definitions and abbreviations are listed below

ACT = Actigraphy, EEG = Electroencephalogram, PLM = Periodic Leg Movement, PSG = Polysomnography, RC = Randomized Controlled Trial, SAD = Sleep Assessment Device, SR = Self Report, % VO2max = Percent of Maximal Oxygen Uptake, VT= Ventilatory Threshold

The Effects of Physical Activity on Sleep: A Meta-Analytic Review

Journal of Behavioral Medicine

M. Alexandra Kredlow, Michelle C. Capozzoli, Bridget A. Heaton, Amanda W. Calkins, and Michael W. Otto

Boston University

kredlow@bu.edu

| Author(s)               | Year | Study Characteristics |                |              | Participant Characteristics     |      |          |                                  | Exercise Characteristics                     |           |                      |               |                           |                 |                     |                    | Sleep Characteristics |                       |           |                 |                          |
|-------------------------|------|-----------------------|----------------|--------------|---------------------------------|------|----------|----------------------------------|----------------------------------------------|-----------|----------------------|---------------|---------------------------|-----------------|---------------------|--------------------|-----------------------|-----------------------|-----------|-----------------|--------------------------|
|                         |      | Subgroup              | n <sup>a</sup> | Study design | Population description          | Male | % Female | Baseline physical activity level | Identified as having sleep complaints? (y/n) | Intensity | Aerobic or anaerobic | Exercise type | Mind body exercise? (y/n) | Time of day     | Duration (mins/day) | Duration (days/wk) | Durations (wks)       | Total duration (mins) | Adherence | Assessment type | Objective measure? (y/n) |
| Jennings et al.         | 1981 |                       | 9              | RCT          | obese                           | 33.3 | 100%     | mixed/unknown                    | n                                            | vigorous  | mixed                | mixed         | n                         | mid-day         | 60                  | 3                  | 9                     | 1620                  | 107.0%    | PSG             | y                        |
| Guilleminault et al.    | 1995 |                       | 20             | RCT          | insomnia patients               | 44.0 | 56%      | mixed/unknown                    | y                                            | vigorous  | aerobic              | walking       | n                         | mid-day         | 45                  | 7                  | 4                     | 1260                  |           | ACT             | y                        |
| King et al.             | 1997 |                       | 43             | RCT          | sleep complaints                | 61.4 | 67%      | low                              | y                                            | vigorous  | aerobic              | mixed         | n                         | mid-day         | 50                  | 4                  | 16                    | 3200                  | 93.6%     | PSQI/SR         | n                        |
| Alessi et al.           | 1999 |                       | 29             | RCT          | nursing home residents          | 88.5 | 90%      | mixed/unknown                    | n                                            |           | mixed                | mixed         | n                         | morning/mid-day | 58.4                | 5                  | 14                    | 4088                  | 83.7%     | ACT             | y                        |
| Naylor et al.           | 2000 |                       | 23             | Matched CT   | nursing home residents          | 75.6 | 65%      | mixed/unknown                    | n                                            |           | mixed                | mixed         | n                         | morning/evening | 45                  | 7                  | 2                     | 630                   |           | EEG             | y                        |
| King et al.             | 2002 |                       | 85             | RCT          | caregivers                      | 62.7 | 100%     | low                              | n                                            | moderate  | mixed                | mixed         | n                         |                 | 35                  | 4                  | 52                    | 7280                  | 73.4%     | PSQI            | n                        |
| Tworoger et al.         | 2003 |                       | 173            | RCT          | overweight/obese postmenopausal | 60.7 | 100%     | low                              | n                                            | moderate  | aerobic              | mixed         | n                         | variable        | 45                  | 5                  | 52                    | 11700                 |           | WHIR            | n                        |
| de Jong et al.          | 2006 |                       | 181            | RCT          | healthy                         | 59.1 | 56%      | low                              | n                                            |           | mixed                | mixed         | n                         | variable        | 60                  | 1                  | 15                    | 900                   | 80.0%     | TAAQOL          | n                        |
| Elavsky et al.          | 2007 | Walking               | 102            | RCT          | healthy                         | 49.9 | 100%     | low                              | n                                            | vigorous  | aerobic              | walking       | n                         |                 | 60                  | 3                  | 16                    | 2880                  | 70.0%     | PSQI            | n                        |
| Elavsky et al.          | 2007 | Yoga                  | 61(39)         | RCT          | healthy                         | 49.9 | 100%     | low                              | n                                            |           | anaerobic            | yoga          | y                         |                 | 90                  | 2                  | 16                    | 2880                  | 63.0%     | PSQI            | n                        |
| Frye et al.             | 2007 | Low impact exercise   | 49             | RCT          | healthy                         | 69.2 | 64%      | low                              | n                                            |           | mixed                | mixed         | n                         | variable        | 60                  | 3                  | 12                    | 2160                  | 91.4%     | PSQI            | n                        |
| Frye et al.             | 2007 | Tai Chi               | 23(21)         | RCT          | healthy                         | 69.2 | 64%      | low                              | n                                            |           | mixed                | tai chi       | y                         | variable        | 60                  | 3                  | 12                    | 2160                  | 91.4%     | PSQI            | n                        |
| Littman et al.          | 2007 |                       | 167            | RCT          | healthy                         | 61.0 | 100%     | low                              | n                                            | moderate  | aerobic              | mixed         | n                         |                 | 45                  | 5                  | 52                    | 11700                 |           | WHIR            | n                        |
| King et al.             | 2008 |                       | 66             | RCT          | sleep complaints                | 61.4 | 67%      | low                              | y                                            | moderate  | mixed                | mixed         | n                         | morning/mid-day | 42                  | 5                  | 52                    | 10920                 | 74.0%     | PSQI/PSG        | mixed                    |
| Chen et al.             | 2009 |                       | 128            | RCT          | healthy                         | 69.2 | 73%      | mixed/unknown                    | n                                            |           | mixed                | yoga          | y                         |                 | 70                  | 3                  | 24                    | 5040                  | 87.0%     | PSQI            | n                        |
| Manzanogue et al.       | 2009 |                       | 39             | RCT          | healthy                         | 19.5 | 87%      | mixed/unknown                    | n                                            |           | mixed                | gigong        | y                         |                 | 30                  | 3                  | 4                     | 360                   |           | PSQI            | n                        |
| Chen et al.             | 2010 |                       | 55             | RCT          | nursing home residents          | 75.4 | 53%      | mixed/unknown                    | n                                            |           | mixed                | yoga          | y                         |                 | 70                  | 3                  | 24                    | 5040                  | 80.8%     | PSQI            | n                        |
| Reid et al.             | 2010 |                       | 17             | RCT          | insomnia patients               | 61.6 | 94%      | low                              | y                                            | moderate  | aerobic              | mixed         | n                         | mid-day         | 40                  | 4                  | 16                    | 2560                  |           | PSQI/SR         | n                        |
| Hosseini et al.         | 2011 |                       | 56             | RCT          | nursing home residents          | 69.1 | 52%      | mixed/unknown                    | n                                            |           | mixed                | tai chi       | y                         |                 | 25                  | 3                  | 12                    | 900                   |           | PSQI            | n                        |
| Richards et al.         | 2011 |                       | 102            | RCT          | nursing home residents          | 82.0 | 64%      | mixed/unknown                    | n                                            |           | anaerobic            | mixed         | n                         | mid-day         | 28                  | 5                  | 7                     | 980                   | 80.0%     | PSG             | y                        |
| Chen et al.             | 2012 |                       | 55             | RCT          | healthy                         | 71.8 | 66%      | mixed/unknown                    | n                                            |           | mixed                | gigong        | y                         |                 | 30                  | 3                  | 12                    | 1080                  |           | PSQI            | n                        |
| Kalak et al.            | 2012 |                       | 51             | RCT          | healthy                         | 18.3 | 53%      | mixed/unknown                    | n                                            |           | aerobic              | running       | n                         | morning         | 33.5                | 5                  | 3                     | 502.5                 |           | ISI/EEG         | mixed                    |
| Kline et al.            | 2012 | 4 KKW                 | 243            | RCT          | healthy                         | 57.3 | 100%     | low                              | n                                            | moderate  | aerobic              | mixed         | n                         |                 | variable            | 3.5                | 24                    |                       | 95.1%     | SPI             | n                        |
| Kline et al.            | 2012 | 8 KKW                 | 99(92)         | RCT          | healthy                         | 57.3 | 100%     | low                              | n                                            | moderate  | aerobic              | mixed         | n                         |                 | variable            | 3.5                | 24                    |                       | 88.5%     | SPI             | n                        |
| Kline et al.            | 2012 | 12 KKW                | 95(92)         | RCT          | healthy                         | 57.3 | 100%     | low                              | n                                            | moderate  | aerobic              | mixed         | n                         |                 | variable            | 3.5                | 24                    |                       | 92.5%     | SPI             | n                        |
| Nguyen et al.           | 2012 |                       | 73             | RCT          | healthy                         | 69.0 | 50%      | mixed/unknown                    | n                                            |           | mixed                | tai chi       | y                         |                 | 60                  | 2                  | 24                    | 2880                  |           | PSQI            | n                        |
| Yeh et al.              | 2012 |                       | 70             | Matched CT   | healthy                         | 48.6 | 100%     | mixed/unknown                    | n                                            |           | anaerobic            | gigong        | y                         |                 | 30                  | 7                  | 12                    | 2520                  |           | PSQI            | n                        |
| Oudegeest-Sander et al. | 2013 |                       | 21             | RCT          | healthy                         | 69.0 | 48%      | low                              | n                                            | vigorous  | aerobic              | cycling       | n                         |                 | 45                  | 3                  | 52                    | 7020                  | 91.0%     | ACC             | y                        |
| Pinniger et al.         | 2013 | Exercise              | 35             | RCT          | depression/anxiety symptoms     | 39.5 | 89%      | mixed/unknown                    | n                                            |           | mixed                | mixed         | n                         |                 | 90                  | 1                  | 8                     | 720                   | 77.0%     | ISI             | n                        |
| Pinniger et al.         | 2013 | Tango                 | 23(18)         | RCT          | depression/anxiety symptoms     | 39.5 | 90%      | mixed/unknown                    | n                                            |           | mixed                | tango         | n                         |                 | 90                  | 1                  | 8                     | 720                   | 77.0%     | ISI             | n                        |

<sup>a</sup>Participants utilized multiple times are noted in parentheses  
Definitions and abbreviations are listed below

ACC = Accelerometer, ACT = Actigraphy, EEG = Electroencephalogram, ISI = Insomnia Severity Index, Matched CT = Matched Controlled Trial, PLM = Periodic Leg Movement, PSG = Polysomnography, PSQI = Pittsburg Sleep Quality Inventory, RCT = Randomized Controlled Trial, SAD = Sleep Assessment Device, SR = Self Report, TAAQOL = TNO-AZL Adult Quality of Life, SPI = Sleep Problems Index, %VO2max = Percent of Maximal Oxygen Uptake, VT= Ventilatory Threshold, WHIRS = Women's Health Initiative Insomnia Rating Scale

The Effects of Physical Activity on Sleep: A Meta-Analytic Review

Journal of Behavioral Medicine

M. Alexandra Kredlow, Michelle C. Capozzoli, Bridget A. Hearon, Amanda W. Calkins, and Michael W. Otto

Boston University

[kredlow@bu.edu](mailto:kredlow@bu.edu)
