# Supplementary material for: The effects of physical activity on sleep: a meta-analytic review
Source: Springer Nature journal article supplement (doi:10.1007/s10865-015-9617-6), 2015-01-17
Supplement: 10865_2015_9617_MOESM2_ESM.pdf [file 10865_2015_9617_MOESM2_ESM.pdf]

Table 5.

## PSQI Subscales - Regular Exercise Studies

| Author(s) <sup>a</sup>            | Year        | n <sup>b</sup> | Study design | Subgroup            | PSQI Daytime   | PSQI Disturbance | PSQI Duration  | PSQI Efficiency | PSQI Latency   | PSQI Meds   | PSQI Subjective Quality |
|-----------------------------------|-------------|----------------|--------------|---------------------|----------------|------------------|----------------|-----------------|----------------|-------------|-------------------------|
| Jennings et al.                   | 1981        | 9              | RCT          |                     |                |                  |                |                 |                |             |                         |
| <b>Guilleminault et al.</b>       | <b>1995</b> | 20             | RCT          |                     |                |                  |                |                 |                |             |                         |
| <b>King et al.</b>                | <b>1997</b> | 43             | RCT          |                     | 0.55           | 0.38             | 0.63           | 0.55            | 0.86           | 0.36        | 0.69                    |
| Alessi et al.                     | 1999        | 29             | RCT          |                     |                |                  |                |                 |                |             |                         |
| Naylor et al.                     | 2000        | 23             | Matched CT   |                     |                |                  |                |                 |                |             |                         |
| King et al.                       | 2002        | 85             | RCT          |                     |                |                  | 0.33           |                 | 0.04           |             | 0.44                    |
| Tworoger et al.                   | 2003        | 173            | RCT          |                     |                |                  |                |                 |                |             |                         |
| de Jong et al.                    | 2006        | 181            | RCT          |                     |                |                  |                |                 |                |             |                         |
| Elavsky et al.                    | 2007        | 102            | RCT          | Walking             | 0.13           | 0.04             | 0.36           | 0.35            | 0.42           | 0.07        | 0.13                    |
| Elavsky et al.                    | 2007        | 61(39)         | RCT          | Yoga                | -0.18          | 0.27             | -0.01          | -0.01           | 0.35           | 0.00        | 0.15                    |
| Frye et al.                       | 2007        | 49             | RCT          | Low impact exercise |                |                  |                |                 |                |             |                         |
| Frye et al.                       | 2007        | 23(21)         | RCT          | Tai Chi             |                |                  |                |                 |                |             |                         |
| Littman et al.                    | 2007        | 167            | RCT          |                     |                |                  |                |                 |                |             |                         |
| <b>King et al.</b>                | <b>2008</b> | 66             | RCT          |                     | 0.65           | 0.63             | 0.03           |                 |                |             |                         |
| Chen et al.                       | 2009        | 128            | RCT          |                     | 0.90           |                  |                |                 | 0.70           |             | 1.12                    |
| Manzaneque et al.                 | 2009        | 39             | RCT          |                     |                |                  |                |                 |                |             |                         |
| Chen et al.                       | 2010        | 55             | RCT          |                     | 0.98           | 1.36             | 0.90           | 0.98            |                |             |                         |
| <b>Reid et al.</b>                | <b>2010</b> | 17             | RCT          |                     | 1.44           | 0.80             | 1.22           | 1.83            | 1.14           | 0.74        | 2.29                    |
| Hosseini et al.                   | 2011        | 56             | RCT          |                     |                |                  |                |                 |                |             |                         |
| Richards et al.                   | 2011        | 102            | RCT          |                     |                |                  |                |                 |                |             |                         |
| Chen et al.                       | 2012        | 55             | RCT          |                     | 1.80           | 0.56             | 1.46           | 0.75            | 1.55           | 0.47        | 1.87                    |
| Kalak et al.                      | 2012        | 51             | RCT          |                     |                |                  |                |                 |                |             |                         |
| Kline et al.                      | 2012        | 243            | RCT          | 4 KKW               |                |                  |                |                 |                |             |                         |
| Kline et al.                      | 2012        | 99(92)         | RCT          | 8 KKW               |                |                  |                |                 |                |             |                         |
| Kline et al.                      | 2012        | 95(92)         | RCT          | 12 KKW              |                |                  |                |                 |                |             |                         |
| Nguyen et al.                     | 2012        | 73             | RCT          |                     |                |                  |                |                 |                |             |                         |
| Yeh et al.                        | 2012        | 70             | Matched CT   |                     | 0.94           | 0.80             | 1.26           | 1.99            | 1.38           | 0.15        | 2.14                    |
| Oudegeest-Sander et al.           | 2013        | 21             | RCT          |                     |                |                  |                |                 |                |             |                         |
| Pinniger et al.                   | 2013        | 35             | RCT          | Exercise            |                |                  |                |                 |                |             |                         |
| Pinniger et al.                   | 2013        | 23(18)         | RCT          | Tango               |                |                  |                |                 |                |             |                         |
| <b>Overall Effect<sup>c</sup></b> |             | <b>2193</b>    |              |                     | <b>0.75***</b> | <b>0.56***</b>   | <b>0.63***</b> | <b>0.85**</b>   | <b>0.75***</b> | <b>0.19</b> | <b>1.02***</b>          |

## Notes.

<sup>a</sup>Studies conducted with participants with sleep disturbance in bold

<sup>b</sup>Participants utilized multiple times are noted in parentheses

<sup>c</sup>Overall effect only presented for outcomes with n > 5 comparisons

Definitions and abbreviations are listed below:

PSQI = Pittsburgh Sleep Quality Index, RCT= Randomized Controlled Trial, Matched CT = Matched Controlled Trial

\* p<.05 \*\*p<.01 \*\*\*p<.001

The Effects of Physical Activity on Sleep: A Meta-Analytic Review

Journal of Behavioral Medicine

M. Alexandra Kredlow, Michelle C. Capozzoli, Bridget A. Hearon, Amanda W. Calkins, and Michael W. Otto

Boston University

kredlow@bu.edu
