# Supplementary material for: The effects of physical activity on sleep: a meta-analytic review
Source: Springer Nature journal article supplement (doi:10.1007/s10865-015-9617-6), 2015-01-17

## **Funnel Plots**

The Effects of Physical Activity on Sleep: A Meta-Analytic Review

Journal of Behavioral Medicine

M. Alexandra Kredlow, Michelle C. Capozzoli, Bridget A. Hearon, Amanda W. Calkins, and Michael W. Otto

Boston University

kredlow@bu.edu

### Acute Exercise: Total Sleep Time

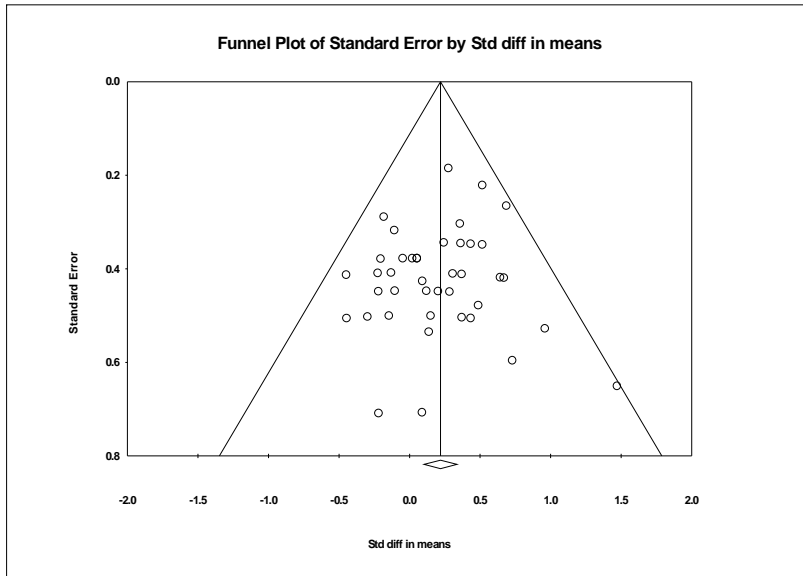

### Acute Exercise: Sleep Onset Latency

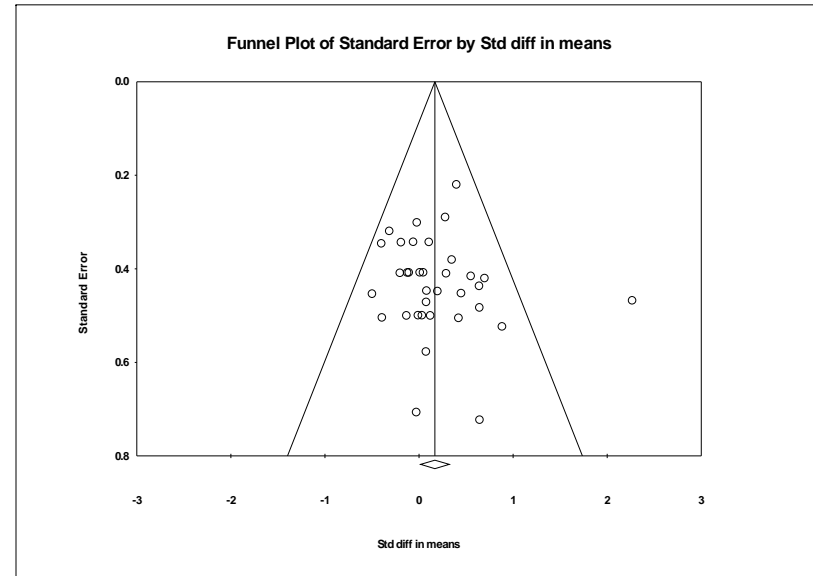

### Acute Exercise: Wake Time After Sleep Onset

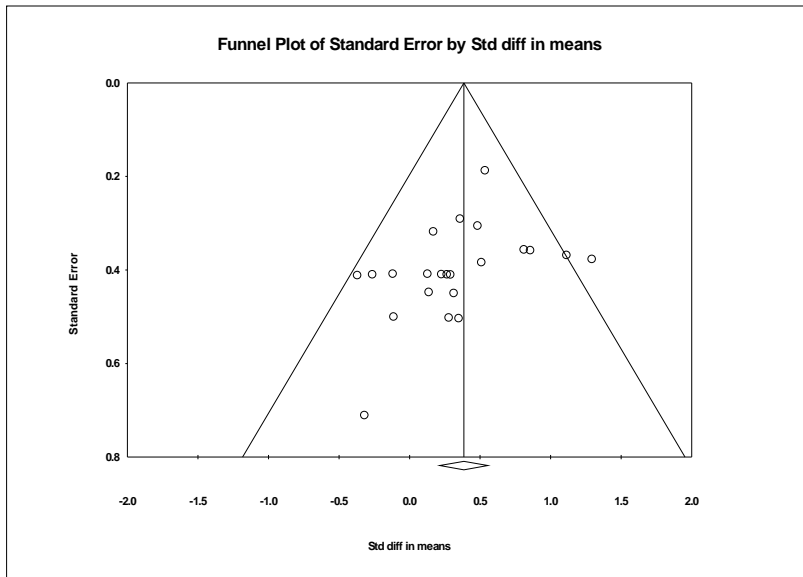

### Acute Exercise: Sleep Efficiency

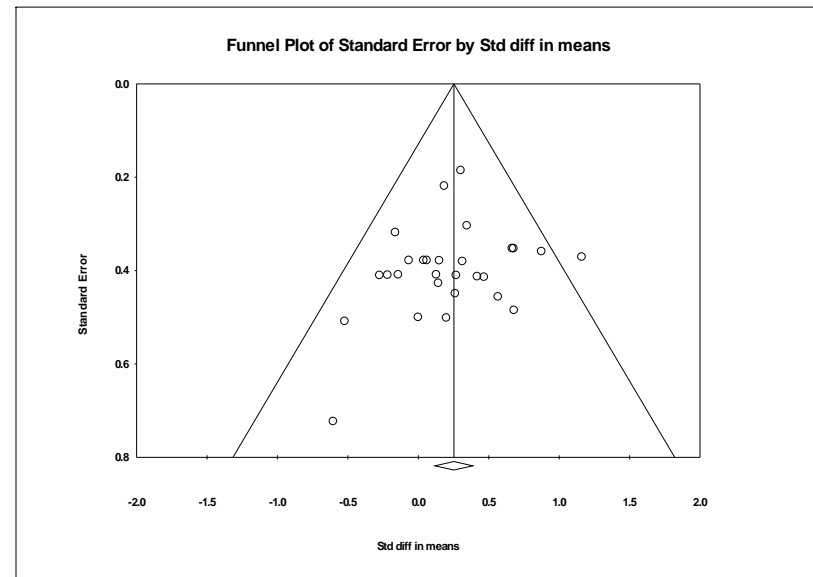

### Acute Exercise: Stage 1 Sleep

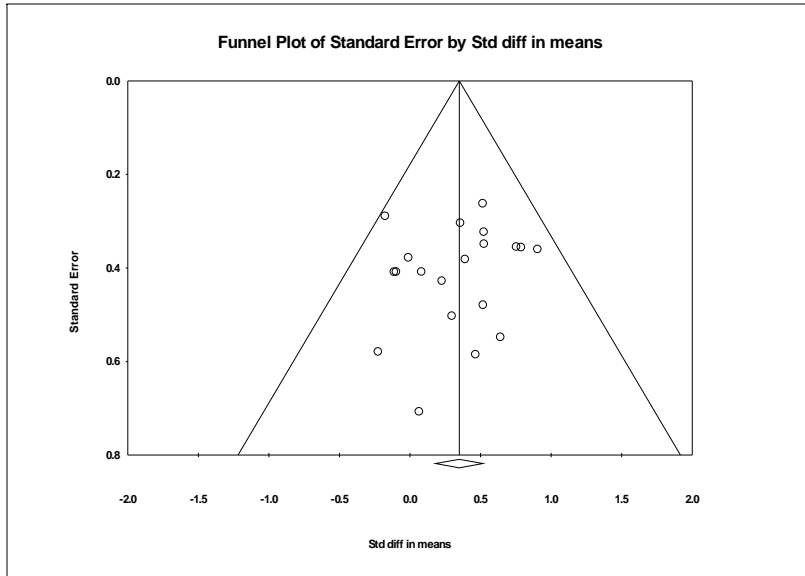

### Acute Exercise: Slow Wave Sleep

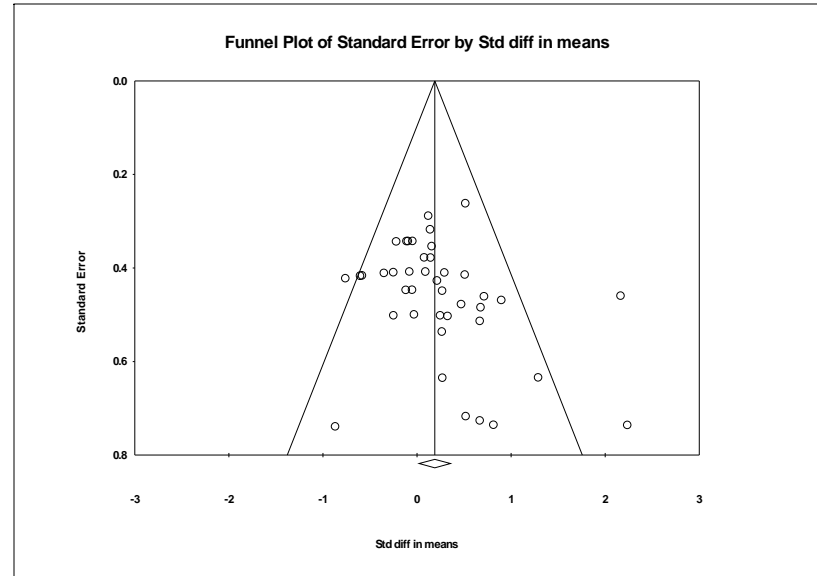

### Acute Exercise: Rapid Eye Movement Sleep

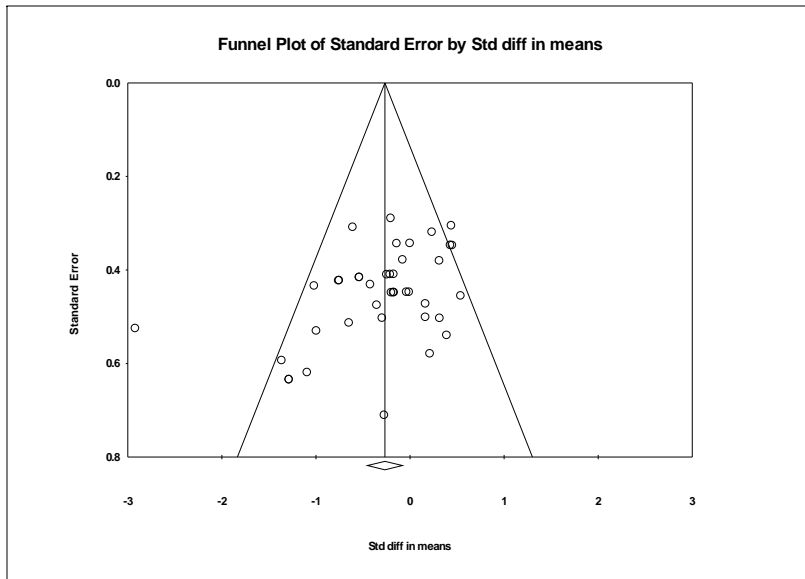

### Regular Exercise: Total Sleep Time

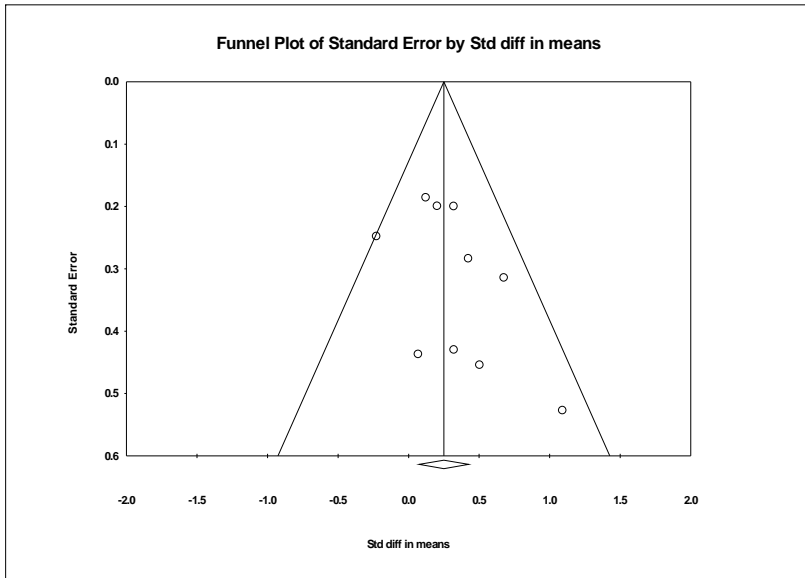

### Regular Exercise: Sleep Onset Latency

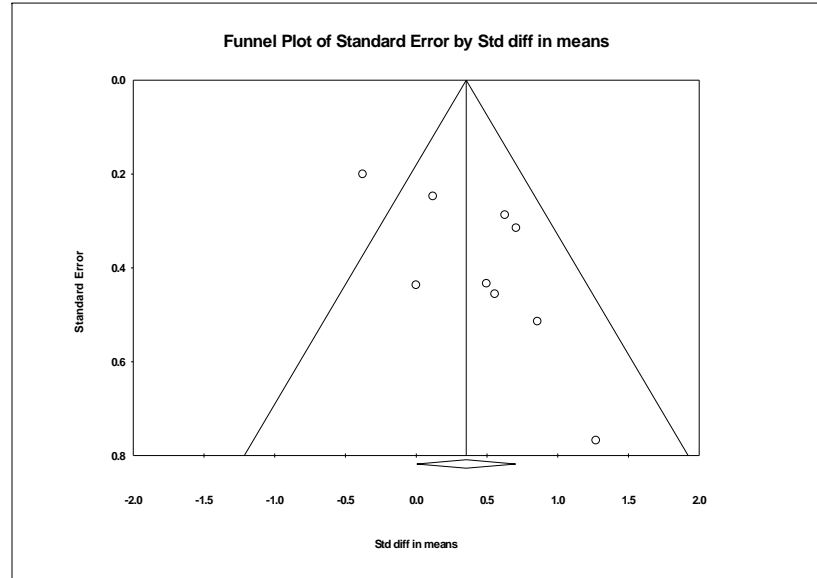

### Regular Exercise: Sleep Efficiency

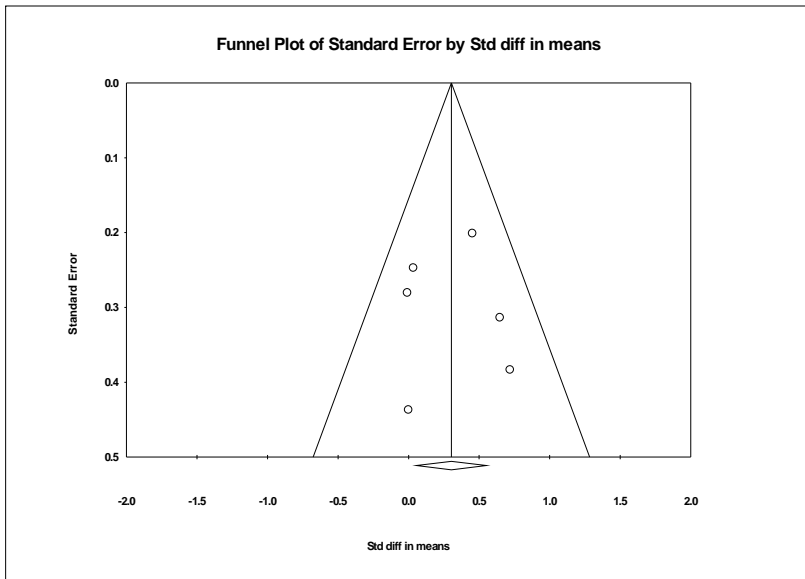

### Regular Exercise: Sleep Quality

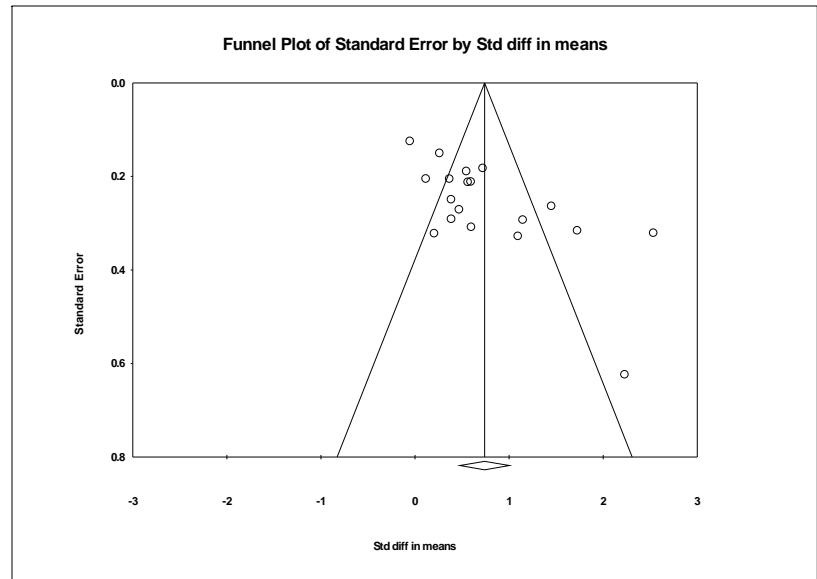

Supplement: 10865_2015_9617_MOESM3_ESM.pdf [file 10865_2015_9617_MOESM3_ESM.pdf]
