# Supplementary material for: The effects of physical activity on sleep: a meta-analytic review
Source: Springer Nature journal article supplement (doi:10.1007/s10865-015-9617-6), 2015-01-17
Supplement: 10865_2015_9617_MOESM4_ESM.pdf [file 10865_2015_9617_MOESM4_ESM.pdf]

| Author(s)                 | Year  | 1) Fitness level | 2) Sleep history | 3) First night effects | 4) Counterbalancing / randomization | 5) Exercise stimulus | 6) Napping, caffeine, outside exercise | 7) Blind scoring | 8) Standard sleep scoring | 9) Customary bedtimes | 10) $\geq 2$ experimental nights |
|---------------------------|-------|------------------|------------------|------------------------|-------------------------------------|----------------------|----------------------------------------|------------------|---------------------------|-----------------------|----------------------------------|
| Adamson et al.            | 1974  | +                | -                | +                      | +                                   | +                    | -                                      | +                | +                         | +                     | +                                |
| Alessi et al.             | 2005  | +                | +                | +                      | n/a                                 | +                    | ?                                      | +                | +                         | +                     | +                                |
| Baekeland et al.          | 1966  | +                | -                | +                      | +                                   | -                    | +/-                                    | ?                | +                         | +                     | -                                |
| Baekeland et al.          | 1970  | +                | -                | -                      | -                                   | -                    | ?                                      | +                | +                         | ?                     | +                                |
| Bevier et al.             | 1992  | +                | -                | +                      | -                                   | +                    | +                                      | ?                | +                         | +                     | -                                |
| Browman et al.            | 1980  | +                | -                | +                      | -                                   | +                    | +                                      | ?                | +                         | +                     | -                                |
| Bulckaert et al.          | 2011  | +                | +                | +                      | +                                   | +                    | +/-                                    | +                | +                         | +                     | -                                |
| Bunnell et al.            | 1983a | +                | -                | +                      | -                                   | +                    | +                                      | -                | +                         | +                     | -                                |
| Bunnell et al.            | 1983b | +                | -                | +                      | -                                   | +                    | +                                      | ?                | +                         | +                     | -                                |
| Desjardins et al.         | 1974  | ?                | ?                | +                      | +                                   | +                    | ?                                      | ?                | ?                         | +                     | -                                |
| Driver et al.             | 1988  | +                | -                | +                      | -                                   | +                    | +                                      | +                | +                         | +                     | -                                |
| Driver et al.             | 1994  | +                | -                | +                      | -                                   | +                    | +/-                                    | +                | +                         | +                     | -                                |
| Esteves et al.            | 2009  | +                | +                | +                      | -                                   | +                    | ?                                      | ?                | +                         | ?                     | -                                |
| Flausino et al.           | 2012  | +                | +                | ?                      | +                                   | +                    | +/-                                    | ?                | +                         | +                     | -                                |
| Griffin & Trinder         | 1978  | +                | -                | +                      | ?                                   | +                    | ?                                      | ?                | +                         | +                     | -                                |
| Hague et al.              | 2003  | +                | +                | +                      | +                                   | +                    | +/-                                    | ?                | +                         | +                     | -                                |
| Horne et al.              | 1983  | +                | +                | +                      | +                                   | +                    | +/-                                    | +                | +                         | +                     | -                                |
| Horne et al.              | 1985  | +                | +                | +                      | +                                   | +                    | +/-                                    | +                | +                         | +                     | -                                |
| Jennings et al.           | 1981  | +                | +                | +                      | -                                   | +                    | ?                                      | ?                | +                         | +                     | +                                |
| Kupfer et al.             | 1985  | +                | +                | +                      | +                                   | +                    | +                                      | +                | +                         | +                     | +                                |
| Matsumoto et al.          | 1984  | +                | +                | +                      | -                                   | +                    | +                                      | ?                | +                         | +                     | -                                |
| Montgomery et al.         | 1985  | +                | -                | +                      | +                                   | +                    | ?                                      | +                | +                         | +                     | +                                |
| Montgomery et al. (Exp 1) | 1988  | +                | -                | +                      | +                                   | -                    | +                                      | +                | +                         | +                     | +                                |
| Montgomery et al. (Exp 2) | 1988  | +                | -                | ?                      | +                                   | -                    | ?                                      | +                | +                         | +                     | +                                |
| Montgomery et al. (Exp 3) | 1988  | +                | -                | ?                      | +                                   | -                    | ?                                      | +                | +                         | +                     | +                                |
| Montmayeur et al.         | 1994  | +                | +                | +                      | +                                   | +                    | +                                      | ?                | +                         | +                     | +                                |
| Morita et al.             | 2011  | -                | +                | +                      | -                                   | +                    | ?                                      | n/a              | +                         | +                     | -                                |
| Myllymäki et al.          | 2011  | +                | +                | -                      | +                                   | +                    | ?                                      | ?                | +                         | +                     | -                                |
| Myllymäki et al.          | 2012  | +                | +                | n/a                    | -                                   | +                    | ?                                      | n/a              | +                         | +                     | -                                |
| O'Conner et al.           | 1998  | +                | +                | +                      | +                                   | +                    | +                                      | +                | +                         | +                     | -                                |
| Oda et al.                | 2001  | +                | -                | +                      | +                                   | +                    | ?                                      | ?                | +                         | +                     | ?                                |
| Passos et al.             | 2010  | +                | +                | +                      | n/a                                 | +                    | ?                                      | +                | +                         | +                     | -                                |
| Paxton et al.             | 1982  | +                | -                | +                      | -                                   | +                    | ?                                      | +                | +                         | ?                     | -                                |
| Paxton et al.             | 1983  | +                | +                | +                      | -                                   | +                    | ?                                      | +                | +                         | +                     | +                                |
| Shapiro et al.            | 1985  | +                | -                | +                      | -                                   | +                    | +/-                                    | +                | +                         | +                     | -                                |
| Trinder et al.            | 1982  | +                | -                | -                      | -                                   | +                    | ?                                      | +                | +                         | +                     | -                                |
| Vein et al.               | 1991  | +                | -                | +                      | -                                   | +                    | ?                                      | ?                | +                         | +                     | -                                |
| Viana et al.              | 2012  | +                | -                | -                      | n/a                                 | +                    | +/-                                    | ?                | +                         | +                     | -                                |
| Walker et al.             | 1978  | +                | -                | +                      | -                                   | +                    | ?                                      | +                | +                         | +                     | -                                |
| Wong et al.               | 2013  | +                | +                | +                      | +                                   | +                    | +/-                                    | +                | +                         | +                     | -                                |
| Zir et al.                | 1971  | +                | -                | +                      | -                                   | +                    | +/-                                    | ?                | +                         | +                     | -                                |

|     |                |
|-----|----------------|
| +   | Yes            |
| +/- | Partially      |
| -   | No             |
| ?   | Unclear        |
| n/a | Not Applicable |

Table 7

Risk of Bias - Regular Exercise Studies

| Author(s)               | Year | Random sequence generation | Allocation concealment | Blinding of participants and personnel | Blinding of outcome assessment | Incomplete outcome data | Selective reporting | Other biases | Overall Assessment |
|-------------------------|------|----------------------------|------------------------|----------------------------------------|--------------------------------|-------------------------|---------------------|--------------|--------------------|
| Alessi et al.           | 1999 | ?                          | ?                      | n/a                                    | +                              | +                       | +                   | +            | Unclear            |
| Alessi et al. (acute)   | 2005 | +                          | ?                      | n/a                                    | +                              | +                       | +                   | +            | Unclear            |
| Chen et al.             | 2009 | +                          | ?                      | n/a                                    | +                              | +                       | +                   | -            | High               |
| Chen et al.             | 2010 | ?                          | ?                      | n/a                                    | +                              | +                       | +                   | +            | Unclear            |
| Chen et al.             | 2012 | +                          | +                      | n/a                                    | +                              | +                       | +                   | +            | Low                |
| de Jong et al.          | 2006 | ?                          | ?                      | n/a                                    | +                              | +                       | +                   | +            | Unclear            |
| Elavsky et al.          | 2007 | +                          | +                      | n/a                                    | +                              | +                       | +                   | +            | Low                |
| Frye et al.             | 2007 | ?                          | ?                      | n/a                                    | +                              | +                       | +                   | +            | Unclear            |
| Guilleminault et al.    | 1995 | ?                          | ?                      | n/a                                    | +                              | +                       | +                   | ?            | Unclear            |
| Hosseini et al.         | 2011 | ?                          | ?                      | n/a                                    | +                              | +                       | +                   | -            | High               |
| Jennings et al.         | 1981 | ?                          | ?                      | n/a                                    | +                              | +                       | +                   | +            | Unclear            |
| Jennings et al. (acute) | 1981 | ?                          | ?                      | n/a                                    | +                              | +                       | +                   | +            | Unclear            |
| Kalak et al.            | 2012 | ?                          | ?                      | n/a                                    | +                              | +                       | +                   | +            | Unclear            |
| King et al.             | 1997 | ?                          | ?                      | n/a                                    | +                              | +                       | +                   | +            | Unclear            |
| King et al.             | 2002 | ?                          | ?                      | n/a                                    | +                              | +                       | +                   | +            | Unclear            |
| King et al.             | 2008 | ?                          | ?                      | n/a                                    | +                              | +                       | +                   | +            | Unclear            |
| Kline et al.            | 2012 | +                          | +                      | n/a                                    | +                              | +                       | +                   | +            | Low                |
| Littman et al.          | 2007 | ?                          | ?                      | n/a                                    | +                              | +                       | +                   | +            | Unclear            |
| Manzaneque et al.       | 2009 | ?                          | ?                      | n/a                                    | +                              | +                       | +                   | +            | Unclear            |
| Naylor et al.           | 2000 | n/a                        | n/a                    | n/a                                    | +                              | +                       | +                   | -            | High               |
| Nguyen et al.           | 2012 | ?                          | ?                      | n/a                                    | +                              | +                       | +                   | +            | Unclear            |
| Oudegeest-Sander et al. | 2013 | ?                          | ?                      | n/a                                    | +                              | +                       | +                   | +            | Unclear            |
| Passos et al. (acute)   | 2010 | ?                          | ?                      | n/a                                    | +                              | +                       | +                   | +            | Unclear            |
| Pinniger et al.         | 2013 | ?                          | ?                      | n/a                                    | +                              | +                       | +                   | +            | Unclear            |
| Reid et al.             | 2010 | ?                          | ?                      | n/a                                    | +                              | +                       | +                   | +            | Unclear            |
| Richards et al.         | 2011 | +                          | +                      | n/a                                    | +                              | +                       | +                   | +            | Low                |
| Tworoger et al.         | 2003 | ?                          | ?                      | n/a                                    | +                              | +                       | +                   | +            | Unclear            |
| Viana et al. (acute)    | 2012 | ?                          | ?                      | n/a                                    | +                              | ?                       | +                   | +            | Unclear            |
| Yeh et al.              | 2012 | n/a                        | n/a                    | n/a                                    | +                              | +                       | +                   | -            | High               |

|     |                |
|-----|----------------|
| +   | Yes            |
| +/- | Partially      |
| -   | No             |
| ?   | Unclear        |
| n/a | Not Applicable |

The Effects of Physical Activity on Sleep: A Meta-Analytic Review  
Journal of Behavioral Medicine

M. Alexandra Kredlow, Michelle C. Capozzoli, Bridget A. Hearon, Amanda W. Calkins, and Michael W. Otto

Boston University

[kredlow@bu.edu](mailto:kredlow@bu.edu)
